# Supplementary material for: Ni0.9Co1.92Se4 nanostructures: binder-free electrode of coral-like bimetallic selenide for supercapacitors
Source: Royal Society of Chemistry journal article supplement (doi:10.1039/c6ra17825a), 2016-01-01
Supplement: c6ra17825a1.pdf [file c6ra17825a1.pdf]

## Supporting Information

# Ni<sub>0.9</sub>Co<sub>1.92</sub>Se<sub>4</sub> Nanostructures: Binder-free Electrode of Coral-like Bimetallic Selenide for supercapacitors

*Weidan An, Ling Liu, Yanfang Gao\*, Yang Liu, Jinrong Liu*

College of Chemical Engineering, Inner Mongolia University of Technology, Hohhot, 010051,  
P.R. China.

\*E-mail: [yf\\_gao@imut.edu.cn](mailto:yf_gao@imut.edu.cn); Fax: +86 471 6503298; Tel: +86 471 6575722

**Keywords:** nanostructures, bimetallic selenide, binder-free electrode, supercapacitors

The EDX pattern demonstrate that the sample is mainly composed of Ni, Co and Se elements, except a little oxygen signal which may be from moisture and oxygen adsorbed on the surface of sample. The quantitative analyses about the mass and atom percentage is tabulated as follows.

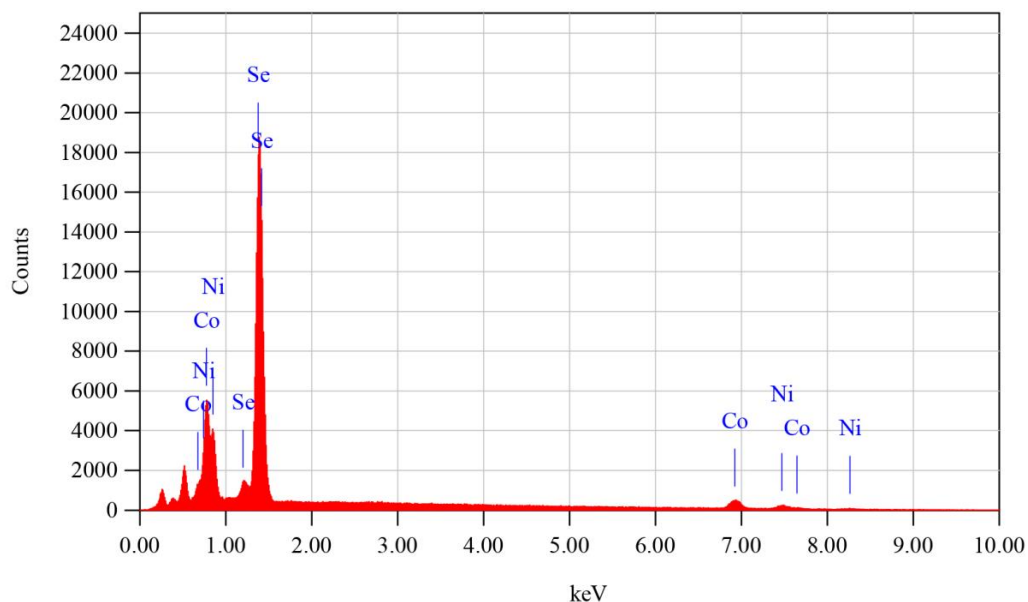

| Element | keV   | Mass% | Atom% | K       |
|---------|-------|-------|-------|---------|
| Ni L*   | 0.851 | 17.31 | 20.29 | 15.6865 |
| Co L*   | 0.776 | 25.91 | 30.24 | 29.8140 |
| Se L*   | 1.379 | 56.78 | 49.47 | 54.4995 |

**Figure S1.** EDX pattern of the Ni<sub>0.9</sub>Co<sub>1.92</sub>Se<sub>4</sub> nanostructures.

The XRD spectra of the Ni-Coprecursor powder shows that the diffraction peaks are well indexed as the  $\text{Ni}_3(\text{CO}_3)(\text{OH})_4 \cdot 4\text{H}_2\text{O}$  (JCPDS no.16-0164) and  $\text{Co}(\text{CO}_3)_{0.5}(\text{OH}) \cdot 0.11\text{H}_2\text{O}$  (JCPDS no.48-0083).

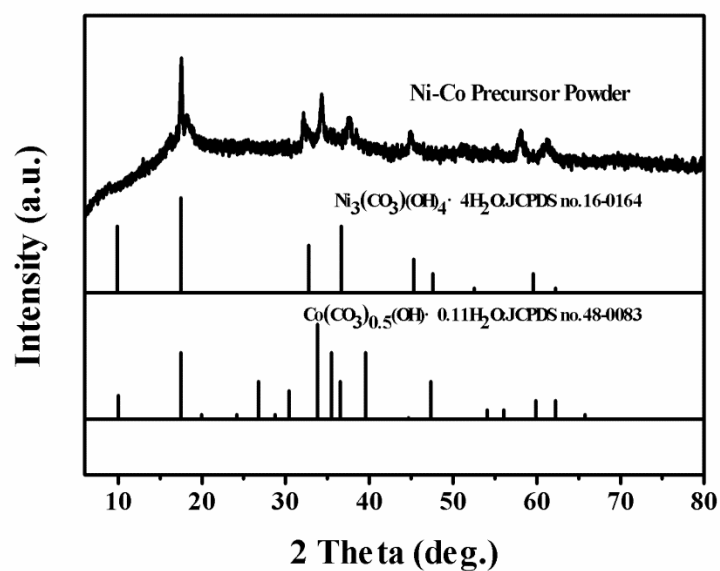

**Figure S2.** XRD spectra of the Ni-Co precursor powder.

4 mmol of  $\text{Co}(\text{NO}_3)_2 \cdot 6\text{H}_2\text{O}$  is dissolved in 80 mL of deionized water to form a homogeneous pink solution, followed by the addition of 12 mmol of  $\text{NH}_4\text{F}$  and 24 mmol of urea, respectively. The solution and the pretreated Ni foam were transferred into a 100 mL Teflon-lined stainlesssteel autoclave, which was sealed and maintained at  $120^\circ\text{C}$  for 6h. After the autoclave cooled down to room temperature, the precursor on Ni foam was washed with ethanol and deionized water several times and dried at  $80^\circ\text{C}$  for 6h. Then, 200 mg of sodium selenite ( $\text{Na}_2\text{SeO}_3$ ) and 10 mL of hydrazine hydrate were added into the 70 mL of absolute ethanol solution with precursor on Ni foam, and the mixture was kept in the autoclave at  $140^\circ\text{C}$  for 12h. After the autoclave cooled down to room temperature, washed with ethanol and deionized water several times and dried at  $80^\circ\text{C}$  for 6h, we get the black sample of  $\text{Co}_{0.85}\text{Se}$  on Ni foam.

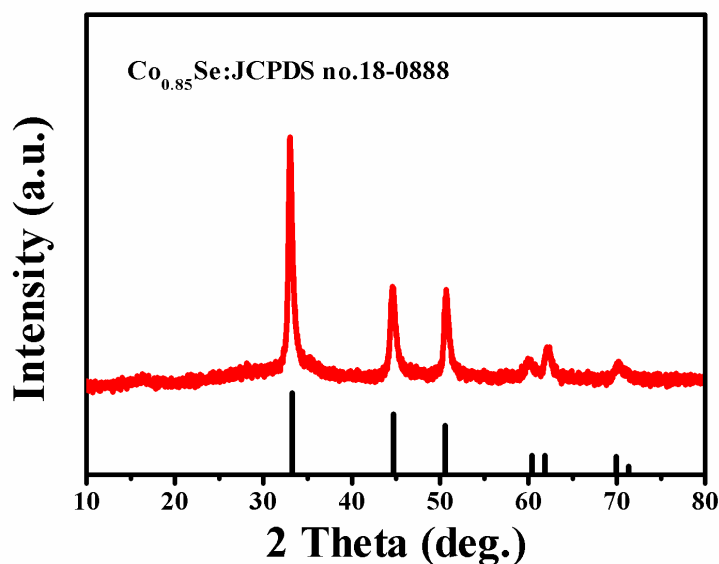

**Figure S3.** XRD spectra of the  $\text{Co}_{0.85}\text{Se}$  powder.

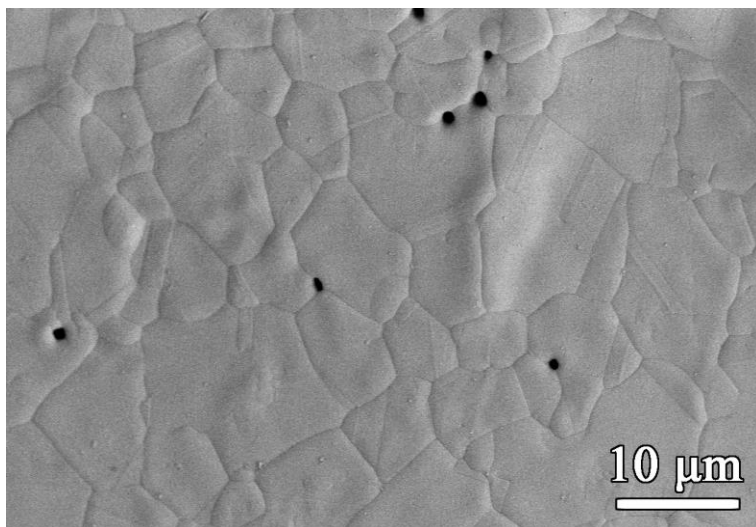

**Figure S4.** FESEM image of the Ni foam.

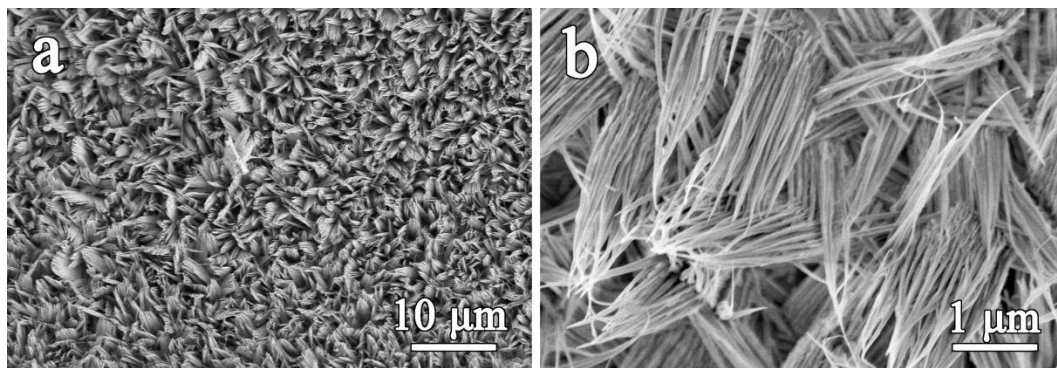

**Figure S5.** (a) SEM and (b)FESEM images of the  $\text{Co}_{0.85}\text{Se}$  precursor on Ni foam at different magnifications.

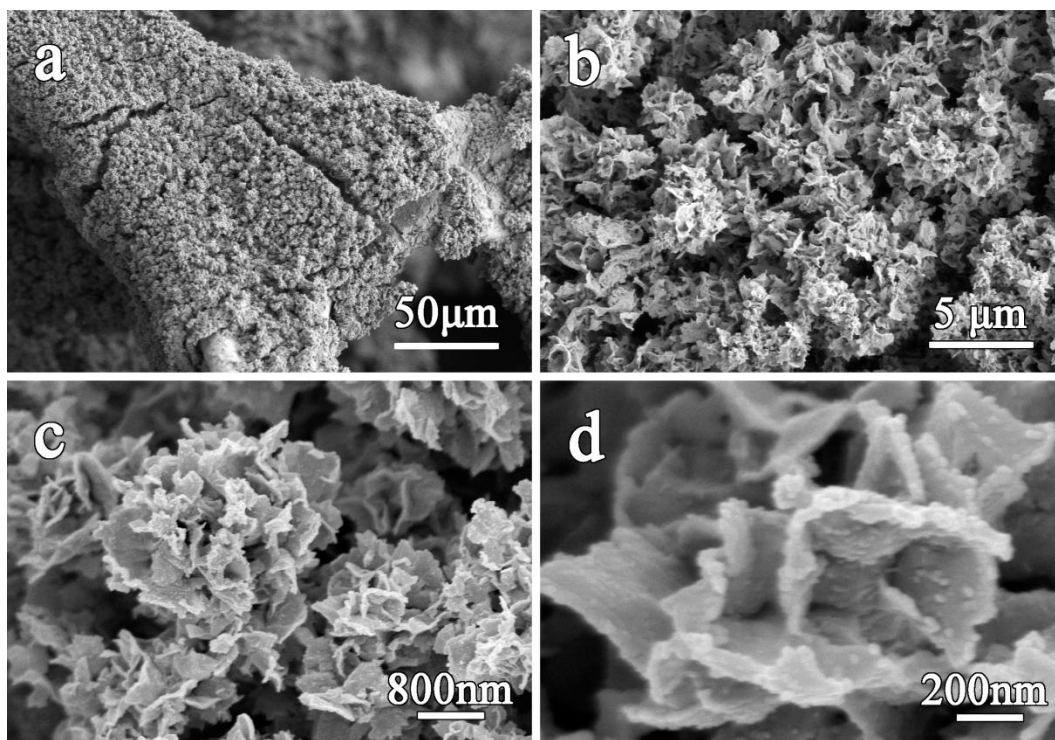

**Figure S6.** (a,b) SEM and (c,d) FESEM images of the Co<sub>0.85</sub>Se on Ni foam at different magnifications.

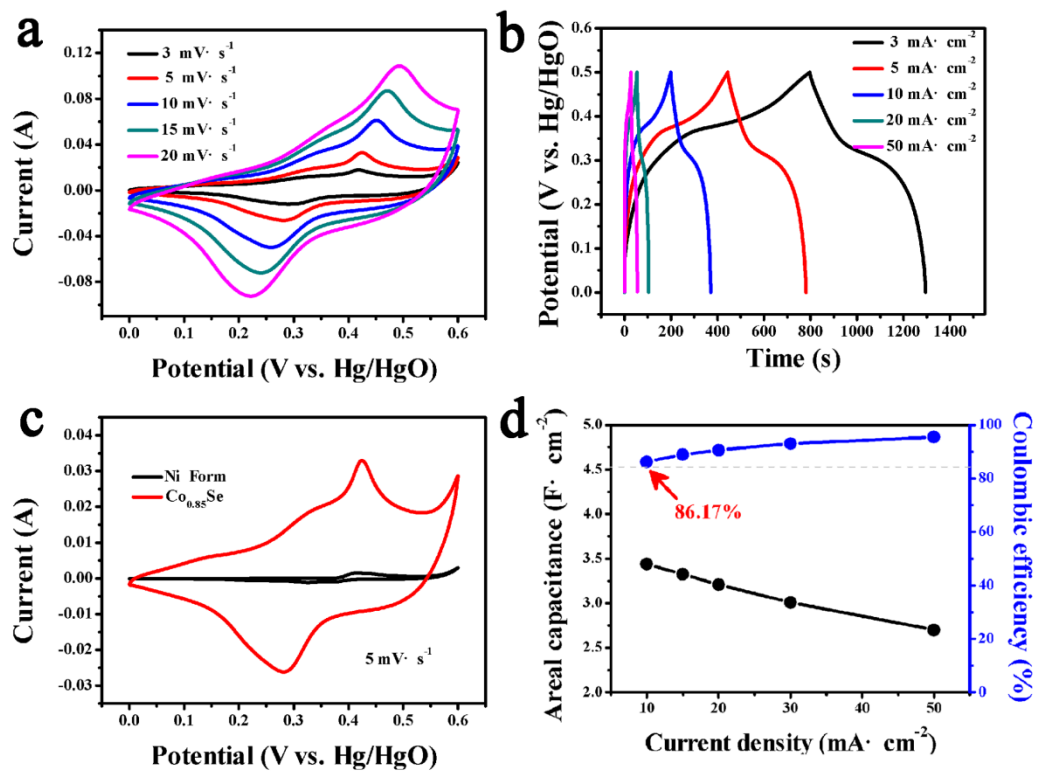

**Figure S7.** Electrochemical performances of the as-prepared samples: (a) CV curves of Co<sub>0.85</sub>Se on Ni foam at the scan rates from 3 to 20 mV·s<sup>-1</sup>; (b) GCD curves of the Co<sub>0.85</sub>Se on Ni foam at the current densities from 3 to 50 mA·cm<sup>-2</sup>; (c) the CV curves of Ni foam and Co<sub>0.85</sub>Se on Ni foam at a scan rate of 5 mV·s<sup>-1</sup>; (d) the areal capacitance and the coulombic efficiency of the Co<sub>0.85</sub>Se on Ni foam at the current densities from 10 to 50 mA·cm<sup>-2</sup>.

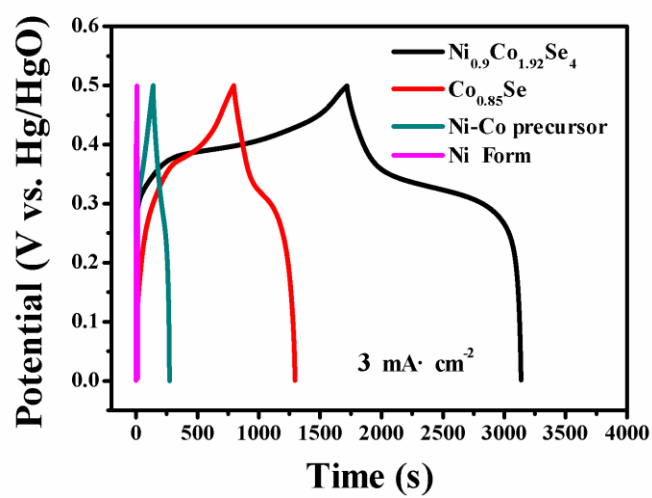

**Figure S8.** Electrochemical performance comparison of the Ni foam,  $\text{Co}_{0.85}\text{Se}$ , Ni-Co precursor and  $\text{Ni}_{0.9}\text{Co}_{1.92}\text{Se}_4$  nanostructures on Ni foam of GCD curves at the current density of  $3 \text{ mA} \cdot \text{cm}^{-2}$ .

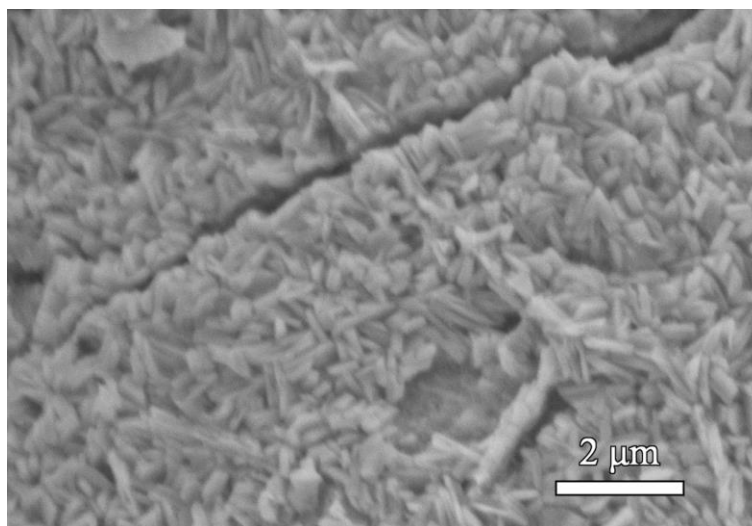

**Figure S9.** SEM image of the  $\text{Ni}_{0.9}\text{Co}_{1.92}\text{Se}_4$  nanostructures on Ni foam after 5000 cycles.



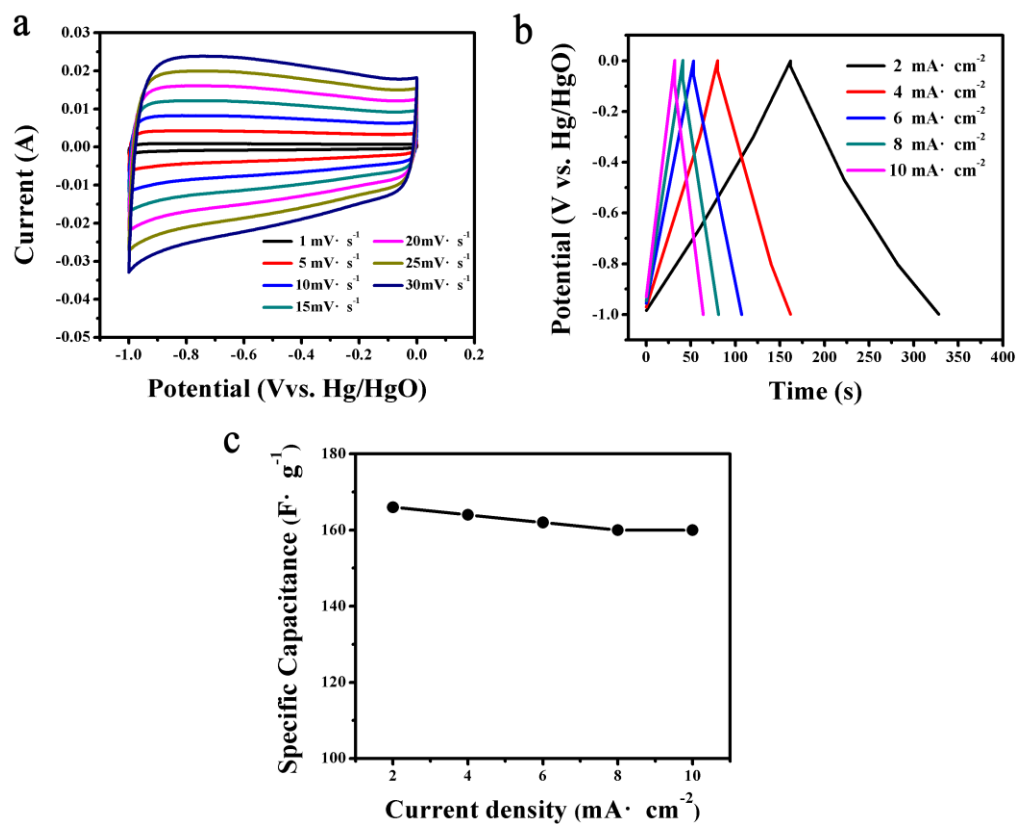

**Figure S10.** Electrochemical performance of the as-prepared samples: (a) CV curves of AC at the scan rates from 1 to 30  $\text{mV} \cdot \text{s}^{-1}$ ; (b) GCD curves of AC at the current densities from 2 to 10  $\text{mA} \cdot \text{cm}^{-2}$ ; (c) the specific capacitance of AC at different current densities.

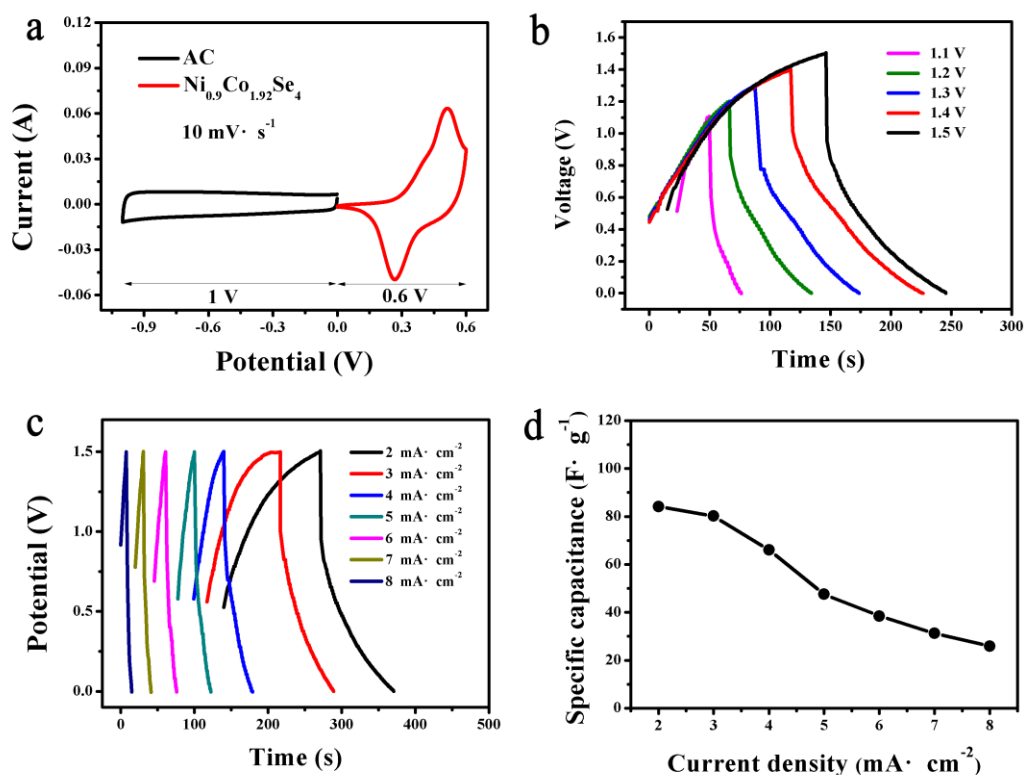

**Figure S11.** Electrochemical performance of the as-prepared samples: (a) CV curves of the  $\text{Ni}_{0.9}\text{Co}_{1.92}\text{Se}_4$  nanostructures and AC with their corresponding potential window at the scan rate of  $10 \text{ mV} \cdot \text{s}^{-1}$ ; GCD curves of the  $\text{Ni}_{0.9}\text{Co}_{1.92}\text{Se}_4$ //AC asymmetric supercapacitor: (b) at the different voltages and (c) at the current densities changing from 2 to  $8 \text{ mA} \cdot \text{cm}^{-2}$ ; (d) the specific capacitance of the asymmetric supercapacitor at different current densities.

**Table S1.** Comparison of Ni<sub>0.9</sub>Co<sub>1.92</sub>Se<sub>4</sub> nanostructures and some similar previously reported materials.

| Nanostructures                                                              | Areal Capacitance                                  | Specific Capacitance                                | Rate capability                        | Power density                                         | Capacitance retention                          | Reference             |
|-----------------------------------------------------------------------------|----------------------------------------------------|-----------------------------------------------------|----------------------------------------|-------------------------------------------------------|------------------------------------------------|-----------------------|
| Hollow Co <sub>0.85</sub> Se nanowire array on Carbon Fiber Paper           | 0.93 F·cm <sup>-2</sup><br>@ 2 mA·cm <sup>-2</sup> | 674 F·g <sup>-1</sup><br>@ 2 mA·cm <sup>-2</sup>    | 65.9% from 2 to 15 mA·cm <sup>-2</sup> | 10.19 Wh·kg <sup>-1</sup> @ (550 W·kg <sup>-1</sup> ) | 89.00% after 2000 cycles@10mA·cm <sup>-2</sup> | 1                     |
| GeSe <sub>2</sub> Nanostructures                                            | 240 μF·cm <sup>-2</sup><br>@ 10mA·cm <sup>-2</sup> | 300 F·g <sup>-1</sup><br>@ 1 A·g <sup>-1</sup>      | 60% from 1 to 10 A·g <sup>-1</sup>     |                                                       | 77.50% after 2000 cycles@10mA·cm <sup>-2</sup> | 2                     |
| CoNi <sub>2</sub> S <sub>4</sub> Nanosheet Arrays Supported on Nickel foams | 6.39F·cm <sup>-2</sup><br>@ 5mA·cm <sup>-2</sup>   | 2906 F·g <sup>-1</sup><br>@ 5 mA·cm <sup>-2</sup>   | 78% from 5 to 50 mA·cm <sup>-2</sup>   | 33.9 Wh·kg <sup>-1</sup> @ (409 W·kg <sup>-1</sup> )  | 77.96% after 3000 cycles@30mA·cm <sup>-2</sup> | 3                     |
| Co <sub>0.85</sub> Se on Ni foam                                            | 3.44 F·cm <sup>-2</sup><br>@ 3 mA·cm <sup>-2</sup> | 430.0 F·g <sup>-1</sup><br>@ 3 mA·cm <sup>-2</sup>  | 68% from 3 to 50 mA·cm <sup>-2</sup>   |                                                       |                                                | Additional experiment |
| Ni-Co precursor                                                             | 0.80 F·cm <sup>-2</sup><br>@ 3 mA·cm <sup>-2</sup> | 145.3 F·g <sup>-1</sup><br>@ 3 mA·cm <sup>-2</sup>  | 5.1% from 3 to 50 mA·cm <sup>-2</sup>  |                                                       |                                                | This work             |
| Ni <sub>0.9</sub> Co <sub>1.92</sub> Se <sub>4</sub> on Ni foam             | 6.43 F·cm <sup>-2</sup><br>@ 2 mA·cm <sup>-2</sup> | 1021.1 F·g <sup>-1</sup><br>@ 2 mA·cm <sup>-2</sup> | 77% from 2 to 50 mA·cm <sup>-2</sup>   | 26.29 Wh·kg <sup>-1</sup> @ (265 W·kg <sup>-1</sup> ) | 88.39% after 5000 cycles@20mA·cm <sup>-2</sup> | This work             |

- [1] Banerjee,A.; Bhatnagar,S.; Upadhyay,K.K.; Yadav,P.; Ogale,S.,Hollow Co<sub>0.85</sub>Se nanowire array on carbon fiber paper for high rate pseudocapacitor.ACS applied materials & interfaces, 2014, 6(21): 18844-18852.
- [2] Wang,X.F.; Liu,B.; Wang,Q.F.; Song,W.F.; Hou,X.J.; Chen,D.; Cheng,Y.B.;Shen,G.Z.,Three-dimensional Hierarchical GeSe<sub>2</sub> Nanostructures for High Performance Flexible All-Solid-State Supercapacitors. Advanced Materials, 2013, 25(10): 1479-1486.
- [3] Hu,W.; Chen,R.Q.; Xie,W.; Zou,L.L.; Qin,N.; Bao.D.H., CoNi<sub>2</sub>S<sub>4</sub> Nanosheet Arrays Supported on Nickel Foams with Ultrahigh Capacitance for Aqueous Asymmetric Supercapacitor Applications. ACS applied materials & interfaces, 2014, 6(21): 19318-19326.
- [4] Chen,H.C.; Jiang,J.J.; Zhang,L.; Xia,D.D.; Zhao,Y.D.; Guo,D.Q.; Qi,T.; Wan.H.Z., In situ growth of NiCo<sub>2</sub>S<sub>4</sub> nanotube arrays on Ni foam for supercapacitors: maximizing utilization efficiency at high mass loading to achieve ultrahigh areal pseudocapacitance.Journal of Power Sources, 2014, 254: 249-257.
